# Supplementary material for: Composition and functional analysis of low-molecular-weight glutenin alleles with Aroona near-isogenic lines of bread wheat
Source: PubMed Central journal article supplement (PMC3562532; doi:10.1186/1471-2229-12-243), 2012-12-22
Supplement: 1471-2229-12-243-S2.pdf [file 1471-2229-12-243-S2.pdf]

**Supplementary Table 1: F values of one way ANOVA of wheat quality properties by locations and genotypes <sup>a</sup>**

| Source of variation | DF | LV       | LVS     | EC      | Sha    | IC     | Smo    | Spr    | Str   | TF     | PBTS  |
|---------------------|----|----------|---------|---------|--------|--------|--------|--------|-------|--------|-------|
| Locations (L)       | 1  | 2.1      | 2.0     | 108.8** | 8.2**  | 0.7    | 2.4    | 1.4    | 6.3*  | 13.4** | 4.4*  |
| Genotypes (G)       | 15 | 5.7**    | 3.9**   | 0.8     | 1.7    | 1.5    | 3.2**  | 0.7    | 2.8** | 1.2    | 4.4** |
| L×G                 | 15 | 1.0      | 0.4     | 2.4*    | 1.6    | 1.0    | 1.9    | 0.5    | 1.1   | 1.0    | 0.7   |
| Source of variation | DF | KP       | ZSV     | ST      | DT     | Wab    | Rmax   | EA     | Ext   |        |       |
| Locations (L)       | 1  | 179.2**  | 370**   | 4.3*    | 1.0    | 23.1** | 0.3    | 0.3    | 3.1   |        |       |
| Genotypes (G)       | 15 | 3.2**    | 34.5**  | 6.8**   | 14.4** | 6.4**  | 10.7** | 10.0** | 1.9   |        |       |
| L×G                 | 15 | 0.92     | 1.4     | 1.4     | 2.9**  | 1.3    | 1.9    | 1.3    | 0.6   |        |       |
| source of variation | DF | Glutenin | Gliadin | Gli/Glu | EPP    | UPP    | %UPP   |        |       |        |       |
| Locations (L)       | 1  | 22.5**   | 43.6**  | 0.6     | 15.3** | 2.3    | 0.3    |        |       |        |       |
| Genotypes (G)       | 15 | 1.2      | 4.4**   | 4.8**   | 2.2*   | 2.5*   | 3.5**  |        |       |        |       |
| L×G                 | 15 | 0.9      | 0.5     | 0.7     | 1.6    | 0.9    | 1.1    |        |       |        |       |

\* Significant at  $P<0.05$ ; \*\* Significant  $P<0.01$ .

LV: Loaf volume (cm<sup>3</sup>), LVS: Loaf volume score, EC: External color, Sha: Shape, IC: Inner color, Smo: Smoothness, Spr: Springiness, Str: Structure, TF: Taste flavor, PBTS: Pan bread total score, KP: Kernel protein (%; 14% m.b.), ZSV: Zeleny sedimentation value (mL), ST: Farinograph stability time (min), DT: Farinograph development time (min), Wab: Farinograph water absorption (%), Rmax: Extensograph maximum resistance (B.U.), EA: Energy area (cm<sup>2</sup>), Ext: Extensograph extensibility (mm), EPP: Extractable glutenin polymeric protein; UPP: Unextractable glutenin polymeric protein; Gli/Glu: Ratio of gliadin to glutenin; %UPP=UPP/(UPP+EPP) ×100.

**Supplementary Table 2: Comparison of pan bread quality properties among Aroona NILs<sup>a</sup>**

| NIL                       | LV<br>(cm <sup>3</sup> ) | LVS   | EC   | Sha  | IC   | Smo  | Spr  | Str      | TF   | PBTS     |
|---------------------------|--------------------------|-------|------|------|------|------|------|----------|------|----------|
| Aroona- <i>Glu</i> -A3b   | 719.8a                   | 25.5a | 4.5a | 3.3a | 3.1a | 7.1b | 8.0a | 20.5a    | 3.9a | 75.9ab   |
| Aroona ( <i>Glu</i> -A3c) | 719.0ab                  | 25.5a | 4.4a | 3.6a | 3.3a | 7.3b | 8.4a | 21.5a    | 4.1a | 78.0a    |
| Aroona- <i>Glu</i> -A3d   | 695.3bc                  | 24.0a | 4.5a | 3.0a | 3.0a | 7.0b | 7.6a | 19.8a    | 3.9a | 72.8bc   |
| Aroona- <i>Glu</i> -A3e   | 682.3c                   | 23.5a | 4.6a | 2.8a | 3.0a | 7.0b | 7.9a | 17.8b    | 4.0a | 70.5c    |
| Aroona- <i>Glu</i> -A3f   | 698.3abc                 | 24.0a | 4.4a | 3.1a | 3.0a | 7.9a | 8.1a | 19.8a    | 4.1a | 74.4abc  |
| Aroona- <i>Glu</i> -B3a   | 708.8bc                  | 25.0a | 4.4a | 3.3a | 3.3a | 7.3a | 8.3a | 19.5de   | 3.9a | 74.8cde  |
| Aroona ( <i>Glu</i> -B3b) | 719.0abc                 | 25.5a | 4.4a | 3.6a | 3.3a | 7.3a | 8.4a | 21.5ab   | 4.1a | 78.0abc  |
| Aroona- <i>Glu</i> -B3c   | 715.3abc                 | 25.0a | 4.4a | 3.0a | 3.0a | 6.6a | 7.8a | 18.8e    | 3.6a | 72.1e    |
| Aroona- <i>Glu</i> -B3d   | 700.8c                   | 24.5a | 4.3a | 3.3a | 3.0a | 7.0a | 7.8a | 20.0cde  | 3.9a | 73.6de   |
| Aroona- <i>Glu</i> -B3f   | 709.5bc                  | 24.5a | 4.5a | 3.1a | 3.1a | 7.1a | 8.4a | 20.5abcd | 4.1a | 75.4bcde |
| Aroona- <i>Glu</i> -B3g   | 740.8a                   | 27.0a | 4.3a | 3.4a | 3.3a | 7.1a | 8.5a | 21.8a    | 4.1a | 79.4a    |
| Aroona- <i>Glu</i> -B3h   | 721.5abc                 | 25.5a | 4.4a | 3.5a | 3.3a | 7.6a | 8.3a | 20.3bcd  | 4.1a | 76.9abcd |
| Aroona- <i>Glu</i> -B3i   | 734.8ab                  | 27.0a | 4.5a | 3.3a | 3.0a | 7.3a | 8.1a | 21.0abc  | 4.1a | 78.3ab   |
| Aroona- <i>Glu</i> -D3a   | 739.0a                   | 27.0a | 4.4a | 3.3a | 3.1a | 7.6a | 8.5a | 20.8a    | 4.1a | 78.8a    |
| Aroona- <i>Glu</i> -D3b   | 726.0a                   | 26.5a | 4.3a | 3.3a | 3.1a | 7.5a | 8.4a | 20.3a    | 4.0a | 77.3a    |
| Aroona ( <i>Glu</i> -D3c) | 719.0a                   | 25.5a | 4.4a | 3.6a | 3.3a | 7.3a | 8.4a | 21.5a    | 4.1a | 78.0a    |
| Aroona- <i>Glu</i> -D3d   | 720.0a                   | 25.5a | 4.4a | 3.3a | 3.1a | 8.1a | 8.1a | 20.0a    | 4.1a | 76.6a    |
| Aroona- <i>Glu</i> -D3f   | 747.3a                   | 27.5a | 4.6a | 3.3a | 3.5a | 7.9a | 8.3a | 21.0a    | 4.1a | 80.1a    |

<sup>a</sup> Statistical analysis of the quality parameters of alleles for each glutenin locus with ANOVA and Duncan LSR ( $P<0.05$ ). The parameters are labeled by different letters or letter combinations based on multiple statistical comparisons. No statistical significance exists between the alleles labeled by one or more identical letters. LV: Loaf volume (cm<sup>3</sup>), LVS: Loaf volume score, EC: External color, Sha: Shape, IC: Inner color, Smo: Smoothness, Spr: Springiness, Str: Structure, TF: Taste flavor, PBTS: Pan bread total score.

**Supplementary Table 3: Comparison of dough properties among Aroona NILs<sup>a</sup>**

| NIL                     | KP<br>(%) | ZSV<br>(mL) | ST<br>(min) | DT<br>(min) | Wab<br>(%) | Rmax<br>(B.U.) | EA<br>(cm <sup>2</sup> ) | Ext<br>(mm) |
|-------------------------|-----------|-------------|-------------|-------------|------------|----------------|--------------------------|-------------|
| <i>Aroona-Glu-A3b</i>   | 12.1a     | 46.4b       | 6.5a        | 4.8ab       | 62.8b      | 140.4a         | 41.5b                    | 202.1ab     |
| <i>Aroona (Glu-A3c)</i> | 11.9a     | 44.3c       | 5.4a        | 4.6b        | 61.6c      | 156.8a         | 47.5ab                   | 214.3a      |
| <i>Aroona-Glu-A3d</i>   | 12.4a     | 48.7a       | 6.1a        | 5.0ab       | 60.7d      | 172.7a         | 51.3a                    | 206.3a      |
| <i>Aroona-Glu-A3e</i>   | 12.3a     | 38.3d       | 3.5b        | 3.8c        | 63.9a      | 90.0b          | 25.5c                    | 188.5b      |
| <i>Aroona-Glu-A3f</i>   | 12.1a     | 45.5bc      | 6.9a        | 5.3a        | 62.4b      | 166.8a         | 48.3ab                   | 203.5a      |
| <i>Aroona-Glu-B3a</i>   | 12.4a     | 42.9b       | 4.2cd       | 3.9cd       | 63.0ab     | 95.8cde        | 30.4bc                   | 214.1a      |
| <i>Aroona (Glu-B3b)</i> | 11.9a     | 44.3b       | 5.4ab       | 4.6ab       | 61.6cd     | 156.8ab        | 47.5a                    | 214.3a      |
| <i>Aroona-Glu-B3c</i>   | 12.2a     | 35.9d       | 3.8d        | 3.6d        | 61.9bcd    | 66.3e          | 18.8d                    | 189.2a      |
| <i>Aroona-Glu-B3d</i>   | 12.0a     | 42.7b       | 4.5bcd      | 4.2bc       | 61.0d      | 107.7cd        | 31.0bc                   | 182.2a      |
| <i>Aroona-Glu-B3f</i>   | 12.1a     | 40.5c       | 4.3cd       | 4.3bc       | 62.9abc    | 130.9abc       | 40.7ab                   | 212.0a      |
| <i>Aroona-Glu-B3g</i>   | 12.1a     | 47.5a       | 6.1a        | 4.8a        | 62.6abc    | 164.4a         | 49.7a                    | 211.7a      |
| <i>Aroona-Glu-B3h</i>   | 12.1a     | 42.7b       | 4.6bcd      | 3.8cd       | 63.4a      | 84.6de         | 25.7cd                   | 201.0a      |
| <i>Aroona-Glu-B3i</i>   | 12.2a     | 44.3b       | 4.8bc       | 4.0c        | 60.9d      | 127.3bc        | 43.1a                    | 226.2a      |
| <i>Aroona-Glu-D3a</i>   | 12.1a     | 43.7a       | 5.6a        | 4.8a        | 61.4b      | 146.4a         | 45.2a                    | 213.3a      |
| <i>Aroona-Glu-D3b</i>   | 12.3a     | 43.5a       | 5.5a        | 4.8a        | 61.9ab     | 133.0a         | 41.6a                    | 212.5a      |
| <i>Aroona (Glu-D3c)</i> | 11.9a     | 44.3a       | 5.4a        | 4.6a        | 61.6b      | 156.8a         | 47.5a                    | 214.3a      |
| <i>Aroona-Glu-D3d</i>   | 12.0a     | 45.0a       | 6.9a        | 5.2a        | 62.6a      | 166.1a         | 47.3a                    | 200.1a      |
| <i>Aroona-Glu-D3f</i>   | 12.3a     | 42.8a       | 5.9a        | 5.2a        | 62.2ab     | 163.6a         | 44.8a                    | 195.3a      |

<sup>a</sup> Statistical analysis of the quality parameters of alleles for each glutenin locus with ANOVA and Duncan LSR ( $P<0.05$ ). The parameters are labeled by different letters or letter combinations based on multiple statistical comparisons. No statistical significance exists between the alleles labeled by one or more identical letters.

KP: Kernel protein (%), 14% m.b.), ZSV: Zeleny sedimentation value (mL), ST: Farinograph stability time (min), DT: Farinograph development time (min), Wab: Farinograph water absorption (%), Rmax: Extensograph maximum resistance (B.U.), EA: Energy area (cm<sup>2</sup>), Ext: Extensograph extensibility (mm).

**Supplementary Table 4: Comparison of glutenin macro-polymer properties among Aroona NILs <sup>a</sup>**

| NIL                     | Glutenin<br>(AU) | Gliadin<br>(AU) | Gli/Glu  | EPP<br>(AU) | UPP<br>(AU) | %UPP<br>(%) |
|-------------------------|------------------|-----------------|----------|-------------|-------------|-------------|
| <i>Aroona-Glu-A3b</i>   | 16.9a            | 14.6a           | 0.87b    | 10.1a       | 5.7a        | 36.0a       |
| <i>Aroona (Glu-A3c)</i> | 16.6a            | 14.9a           | 0.90b    | 10.6a       | 5.9a        | 35.7a       |
| <i>Aroona-Glu-A3d</i>   | 17.0a            | 15.5a           | 0.91b    | 10.3a       | 6.7a        | 39.4a       |
| <i>Aroona-Glu-A3e</i>   | 16.2a            | 16.9a           | 1.05a    | 11.1a       | 4.6b        | 29.1b       |
| <i>Aroona-Glu-A3f</i>   | 16.5a            | 15.3a           | 0.93b    | 10.0a       | 5.9a        | 37.0a       |
| <i>Aroona-Glu-B3a</i>   | 16.9a            | 16.8a           | 1.00ab   | 11.6a       | 5.4bc       | 31.7bc      |
| <i>Aroona (Glu-B3b)</i> | 16.6a            | 14.9d           | 0.90d    | 10.6a       | 5.9ab       | 35.7ab      |
| <i>Aroona-Glu-B3c</i>   | 16.2a            | 16.4ab          | 1.02a    | 11.3a       | 4.8c        | 29.9c       |
| <i>Aroona-Glu-B3d</i>   | 16.7a            | 15.3cd          | 0.92bcd  | 10.6a       | 5.3bc       | 33.2bc      |
| <i>Aroona-Glu-B3f</i>   | 16.3a            | 15.4cd          | 0.94abcd | 10.4a       | 5.5bc       | 34.6ab      |
| <i>Aroona-Glu-B3g</i>   | 16.1a            | 13.9e           | 0.87d    | 10.5a       | 6.4a        | 38.0a       |
| <i>Aroona-Glu-B3h</i>   | 16.5a            | 16.3abc         | 0.99abc  | 11.0a       | 5.5bc       | 33.4bc      |
| <i>Aroona-Glu-B3i</i>   | 17.1a            | 15.5bcd         | 0.91cd   | 10.9a       | 5.7ab       | 34.5ab      |
| <i>Aroona-Glu-D3a</i>   | 16.4a            | 15.4a           | 0.94b    | 11.0a       | 6.2a        | 36.3a       |
| <i>Aroona-Glu-D3b</i>   | 16.5a            | 15.2a           | 0.93b    | 9.7a        | 5.1a        | 32.9a       |
| <i>Aroona (Glu-D3c)</i> | 16.6a            | 14.9a           | 0.90b    | 10.6a       | 5.9a        | 35.7a       |
| <i>Aroona-Glu-D3d</i>   | 16.3a            | 15.2a           | 0.93b    | 9.8a        | 6.8a        | 40.4a       |
| <i>Aroona-Glu-D3f</i>   | 14.8a            | 15.3a           | 1.03a    | 9.9a        | 6.7a        | 40.5a       |

<sup>a</sup> Statistical analysis of the quality parameters of alleles for each glutenin locus with ANOVA and Duncan LSR ( $P < 0.05$ ). The parameters are labeled by different letters or letter combinations based on multiple statistical comparisons. No statistical significance exists between the alleles labeled by one or more identical letters.

EPP: Extractable glutenin polymeric protein; UPP: Unextractable glutenin polymeric protein; Gli/Glu: Ratio of gliadin to glutenin; %UPP=UPP/(UPP+EPP) × 100.

**Supplementary Table 5: Composition of glutenin alleles in Aroona and its NILs**

| NIL                    | <i>Glu-A1</i> | <i>Glu-B1</i> | <i>Glu-D1</i> | <i>Glu-A3</i> | <i>Glu-B3</i> | <i>Glu-D3</i> | Donor Parent   |
|------------------------|---------------|---------------|---------------|---------------|---------------|---------------|----------------|
| Aroona                 | a             | c             | a             | c             | b             | c             | Aroona         |
| Aroona- <i>Glu-A3b</i> | a             | c             | a             | b             | b             | c             | Gabo           |
| Aroona- <i>Glu-A3d</i> | a             | c             | a             | d             | b             | c             | Orca           |
| Aroona- <i>Glu-A3e</i> | a             | c             | a             | e             | b             | c             | Lerma Rojo     |
| Aroona- <i>Glu-A3f</i> | a             | c             | a             | f             | b             | c             | Bungulla       |
| Aroona- <i>Glu-B3a</i> | a             | c             | a             | c             | a             | c             | Chinese Spring |
| Aroona- <i>Glu-B3c</i> | a             | c             | a             | c             | c             | c             | Halberd        |
| Aroona- <i>Glu-B3d</i> | a             | c             | a             | c             | d             | c             | Orca           |
| Aroona- <i>Glu-B3f</i> | a             | c             | a             | c             | f             | c             | Gawain         |
| Aroona- <i>Glu-B3g</i> | a             | c             | a             | c             | g             | c             | Millewa        |
| Aroona- <i>Glu-B3h</i> | a             | c             | a             | c             | h             | c             | Sonalika       |
| Aroona- <i>Glu-B3i</i> | a             | c             | a             | c             | i             | c             | Jufy 1         |
| Aroona- <i>Glu-D3a</i> | a             | c             | a             | c             | b             | a             | Chinese Spring |
| Aroona- <i>Glu-D3b</i> | a             | c             | a             | c             | b             | b             | Bungulla       |
| Aroona- <i>Glu-D3d</i> | a             | c             | a             | c             | b             | d             | Jufy 1         |
| Aroona- <i>Glu-D3f</i> | a             | c             | a             | c             | b             | f             | India 115      |
